# Supplementary material
Source: MDPI journal article supplement (https://www.mdpi.com/search?q=membranes-11-00284)
Supplement: s001 [file membranes-11-00284-s001.pdf]

# Supplementary Materials: Effect of Incorporation of Carbon-Based Particles in Enhancing CO<sub>2</sub>/N<sub>2</sub> Separation Performance in Carbon Molecular Sieve Membrane

Chong Yang Chuah <sup>1</sup>, Junghyun Lee <sup>2</sup>, Juha Song <sup>2</sup> and Tae-Hyun Bae <sup>3,\*</sup>

<sup>1</sup> Singapore Membrane Technology Centre, Nanyang Environment and Water Research Institute, Nanyang Technological University, Singapore 637141 Singapore; chongyang.chuah@ntu.edu.sg (C.Y.C.)

<sup>2</sup> School of Chemical and Biomedical Engineering, Nanyang Technological University, Singapore 637459 Singapore; junghyun002@e.ntu.edu.sg (J. L.), songjuha@ntu.edu.sg (J. S.)

<sup>3</sup> Department of Chemical and Biomolecular Engineering, Korea Advanced Institute of Science and Technology, Daejeon 34141, Republic of Korea

\* Correspondence: thbae@kaist.ac.kr

## SUMMARY

**Number of pages:** 8

**Number of Figures:** 10

**Number of Tables:** 4

**Citation:** Chuah, C.Y.; Lee, J.; Song, J.; Bae, T.-H. Carbon Molecular Sieve Membranes Comprising Graphene Oxides and Porous Carbon for CO<sub>2</sub>/N<sub>2</sub> Separation. *Membranes* **2021**, *11*, 284. <https://doi.org/10.3390/membranes11040284>

Academic Editor: Adolfo Iulianelli

Received: 24 March 2021

Accepted: 9 April 2021

Published: 12 April 2021

**Publisher's Note:** MDPI stays neutral with regard to jurisdictional claims in published maps and institutional affiliations.

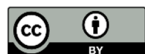

**Copyright:** © 2021 by the authors. Licensee MDPI, Basel, Switzerland. This article is an open access article distributed under the terms and conditions of the Creative Commons Attribution (CC BY) license (<http://creativecommons.org/licenses/by/4.0/>).

**Table S1.** Fitting Parameters for CO<sub>2</sub> and N<sub>2</sub> adsorptions onto GO and YP-50F at 25 °C.

| Sample | Gas             | $q_{sat}$ | $b$     | $R^2$ value | Henry's Constant, $k_H$ |
|--------|-----------------|-----------|---------|-------------|-------------------------|
| GO     | CO <sub>2</sub> | 0.6759    | 1.762   | 0.9942      | 1.191                   |
|        | N <sub>2</sub>  | 0.6759    | 0.07684 | 0.9943      | 0.05194                 |
| YP-50F | CO <sub>2</sub> | 6.087     | 0.7079  | 0.9991      | 4.309                   |
|        | N <sub>2</sub>  | 6.087     | 0.06686 | 0.9992      | 0.4070                  |

Unit of P—bar; Unit of  $q$ —mmol/g**Table S2.** Fitting Parameters for CO<sub>2</sub> and N<sub>2</sub> adsorptions onto GO and YP-50F at 35 °C.

| Sample | Gas             | $q_{sat,1}$ | $b$     | $R^2$ value | Henry's Constant, $k_H$ |
|--------|-----------------|-------------|---------|-------------|-------------------------|
| GO     | CO <sub>2</sub> | 0.5976      | 1.541   | 0.9959      | 0.9209                  |
|        | N <sub>2</sub>  | 0.5976      | 0.07229 | 0.9915      | 0.04320                 |
| YP-50F | CO <sub>2</sub> | 5.854       | 0.535   | 0.9987      | 3.132                   |
|        | N <sub>2</sub>  | 5.854       | 0.05791 | 0.9996      | 0.3390                  |

Unit of P—bar; Unit of  $q$ —mmol/g**Table S3.** Performance of pure CMSMs that reported in the literature for CO<sub>2</sub>/N<sub>2</sub> separation.

| Polymer Matrix    | Carbonization Condi-<br>tion | Measurement Condi-<br>tion  | CO <sub>2</sub> Permeability<br>(Barrer) | CO <sub>2</sub> /N <sub>2</sub> Selectiv-<br>ity | Ref.      |
|-------------------|------------------------------|-----------------------------|------------------------------------------|--------------------------------------------------|-----------|
| BTPA-ODA          | 550 °C, Argon                | 25 °C, Pure gas             | 1500                                     | 32.6                                             | [1]       |
| BTPA-ODA-1        | 700 °C, Argon                | 25 °C, Pure gas             | 300                                      | 37.5                                             | [1]       |
| Br-Matrimid-1     | 550 °C, Vacuum               | 35 °C, 10 atm, Pure gas     | 2900                                     | 11.3                                             | [2]       |
| Kapton            | 550 °C, Vacuum               | 25 °C, Pure gas             | 100                                      | 8.0                                              | [3]       |
| Matrimid          | 475 °C, Vacuum               | 25 °C, Pure gas             | 11                                       | 14.0                                             | [3]       |
| Matrimid-1        | 550 °C, Vacuum               | 35 °C, 10 atm, Pure gas     | 871                                      | 14.8                                             | [2]       |
| Matrimid-2        | 550 °C, Argon                | 35 °C, mixed gas<br>(20/80) | 428                                      | 39.4                                             | This work |
| ODPA-TMPDA        | 550 °C, Argon                | 35 °C, mixed gas<br>(20/80) | 1120                                     | 20.0                                             | This work |
| Kapton-1          | 600 °C, Vacuum               | 35 °C, Pure gas             | 1820                                     | 22.2                                             | [4]       |
| ODPA-ODA          | 650 °C                       | 50 °C, Pure gas             | 201                                      | 17.0                                             | [5]       |
| P84               | 600 °C, Nitrogen             | Pure gas                    | 276                                      | 35.4                                             | [6]       |
| P84-Ag            | 600 °C, Nitrogen             | Pure gas                    | 619                                      | 31.1                                             | [6]       |
| PEI               | 550 °C, Vacuum               | 25 °C, Pure gas             | 69                                       | 7.6                                              | [7]       |
| PEI-1             | 500 °C, Vacuum               | 26 °C, Pure gas             | 53                                       | 17.5                                             | [8]       |
| Polypyrrole       | 550 °C, Nitrogen             | 35 °C, Pure gas             | 3520                                     | 35.2                                             | [9]       |
| Poly(amino imide) | 150 °C, Nitrogen             | 35 °C, Pure gas             | 3                                        | 20.0                                             | [9]       |
| PPO-2             | 650 °C, Vacuum               | 25 °C, Pure gas             | 218                                      | 45.4                                             | [10]      |

Note: BTDA—Benzophenone tetracarboxylic dianhydride; ODA—4,4'-oxydianiline; PPO—poly(p-phenylene oxide); TMS—chlorotrimethylsilane.

**Table S4.** Performance of mixed-matrix CMSMs for CO<sub>2</sub>/N<sub>2</sub> separation.

| Membranes                   | Measurement Condition    | CO <sub>2</sub> Permeability (Barrer) | CO <sub>2</sub> /N <sub>2</sub> Selectivity | F <sub>index</sub> | Ref.      |
|-----------------------------|--------------------------|---------------------------------------|---------------------------------------------|--------------------|-----------|
| 15 wt% GO (Matrimid)        | 35 °C, mixed gas (21/79) | 900                                   | 39.8                                        | 0.77               | This work |
| 15 wt% GO (ODPA-TMPDA)      | 35 °C, mixed gas (21/79) | 1526                                  | 27.6                                        | 1.24               | This work |
| 15 wt% YP-50F (Matrimid)    | 35 °C, mixed gas (21/79) | 1294                                  | 32.9                                        | 0.59               | This work |
| 15 wt% YP-50F (ODPA-TMPDA)  | 35 °C, mixed gas (21/79) | 1833                                  | 30.4                                        | 1.70               | This Work |
| 30 wt% PS-MFI (ODPA-TMPDA)  | 35 °C, mixed gas (20/80) | 2397                                  | 28.8                                        | 1.81               | This work |
| 30 wt% ETS-10 (ODPA-TMPDA)  | 35 °C, mixed gas (20/80) | 1234                                  | 34.2                                        | 1.59               | This work |
| 30 wt% SAPO-34 (ODPA-TMPDA) | 35 °C, mixed gas (20/80) | 2615                                  | 31.7                                        | 2.15               | This work |
| 15 wt% FS (ODPA-TMPDA)      | 35 °C, mixed gas (20/80) | 1560                                  | 30.7                                        | 1.54               | This work |
| 24 wt% SBA-15 (PAA)         | 25 °C, mixed gas (50/50) | 1939                                  | 66                                          | 0.14               | [11]      |
| 24 wt% MCM-48 (PAA)         | 25 °C, mixed gas (50/50) | 2850                                  | 61                                          | 0.31               | [11]      |
| 3 wt% Zeolite L (PFA)       | 25 °C, pure gas          | 503                                   | 20                                          | 2.97               | [12]      |
| 2 wt% Zeolite T (PFA)       | 25 °C, pure gas          | 74                                    | 51.6                                        | 1.45               | [13]      |

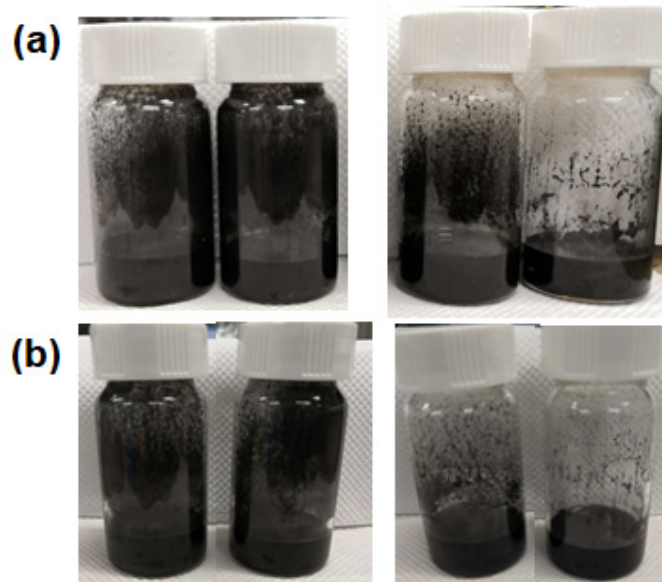

**Figure S1.** Photographic images upon the incorporation of GO (left) and YP-50F (right) onto Matrimid® 5218 (left) and ODPA-TMPDA (right) dope solution. The photos were taken at (a) 12 h and (b) 24 h after stopping agitation, respectively.

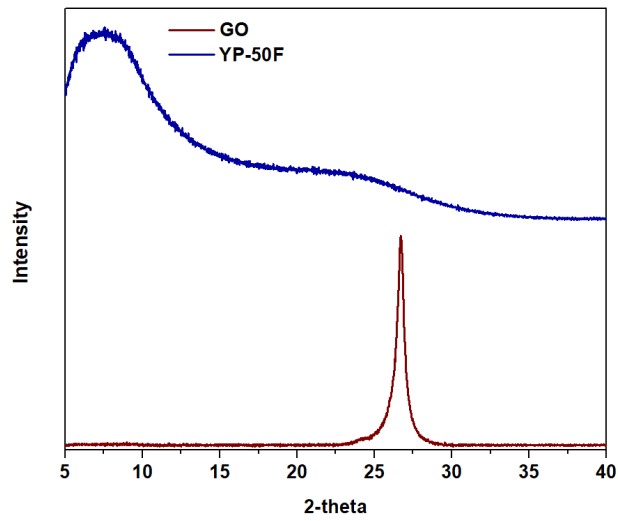

Figure S2. XRD of GO and YP-50F.

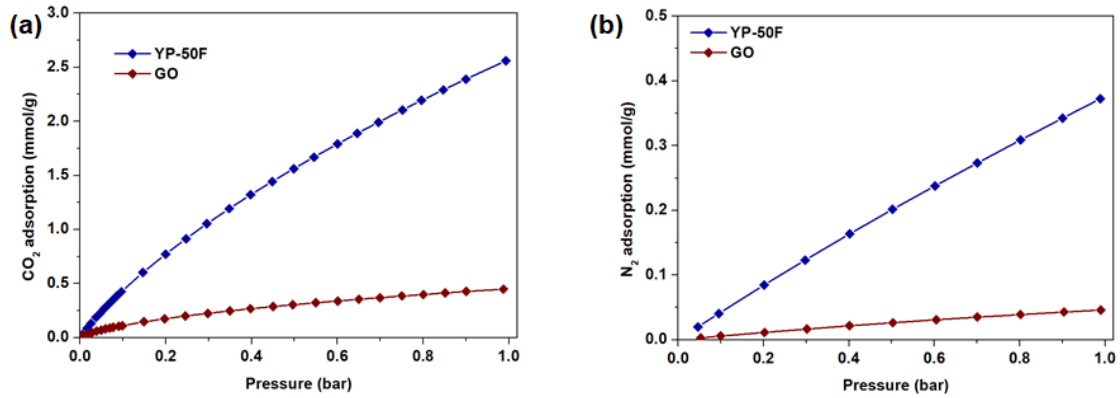

Figure S3. (a, b) CO<sub>2</sub> and N<sub>2</sub> adsorptions on GO and activated carbon (YP-50F) at 25 °C.

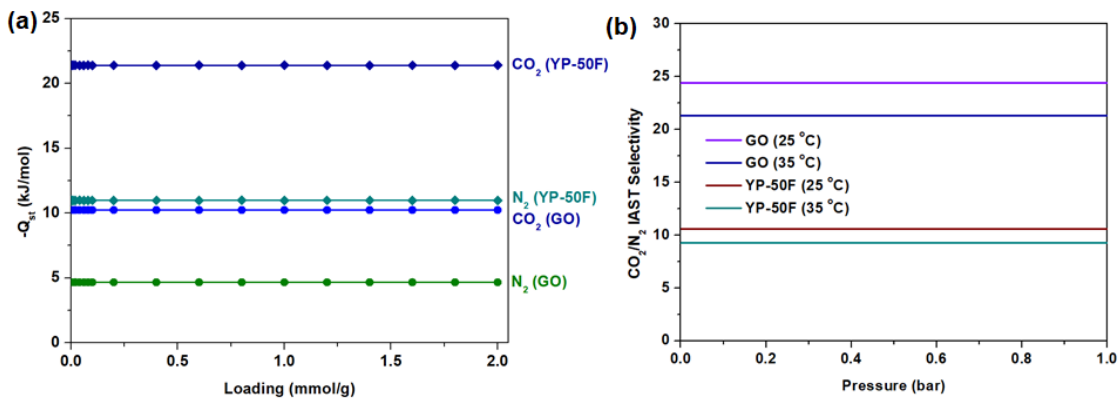

Figure S4. (a) The isosteric heats of adsorption ( $-Q_{st}$ ) of CO<sub>2</sub> and N<sub>2</sub> and (b) CO<sub>2</sub>/N<sub>2</sub> IAST selectivity for GO and YP-50F (the ratio of CO<sub>2</sub>/N<sub>2</sub> in the feed is 20/80).

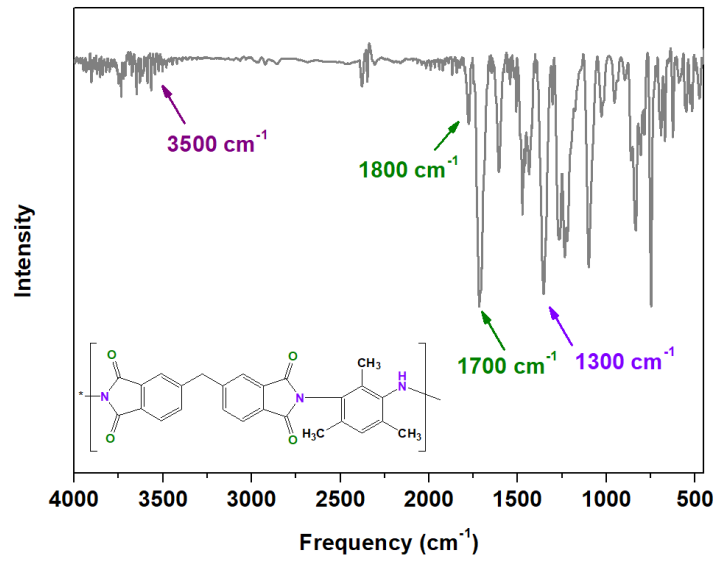

Figure S5. FT-IR spectrum of ODPA-TMPDA polymer.

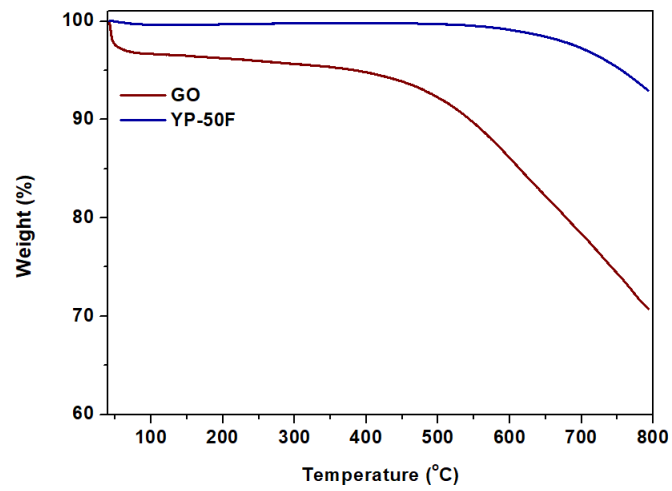

Figure S6. The TGA curves of GO and activated carbon (YP-50F).

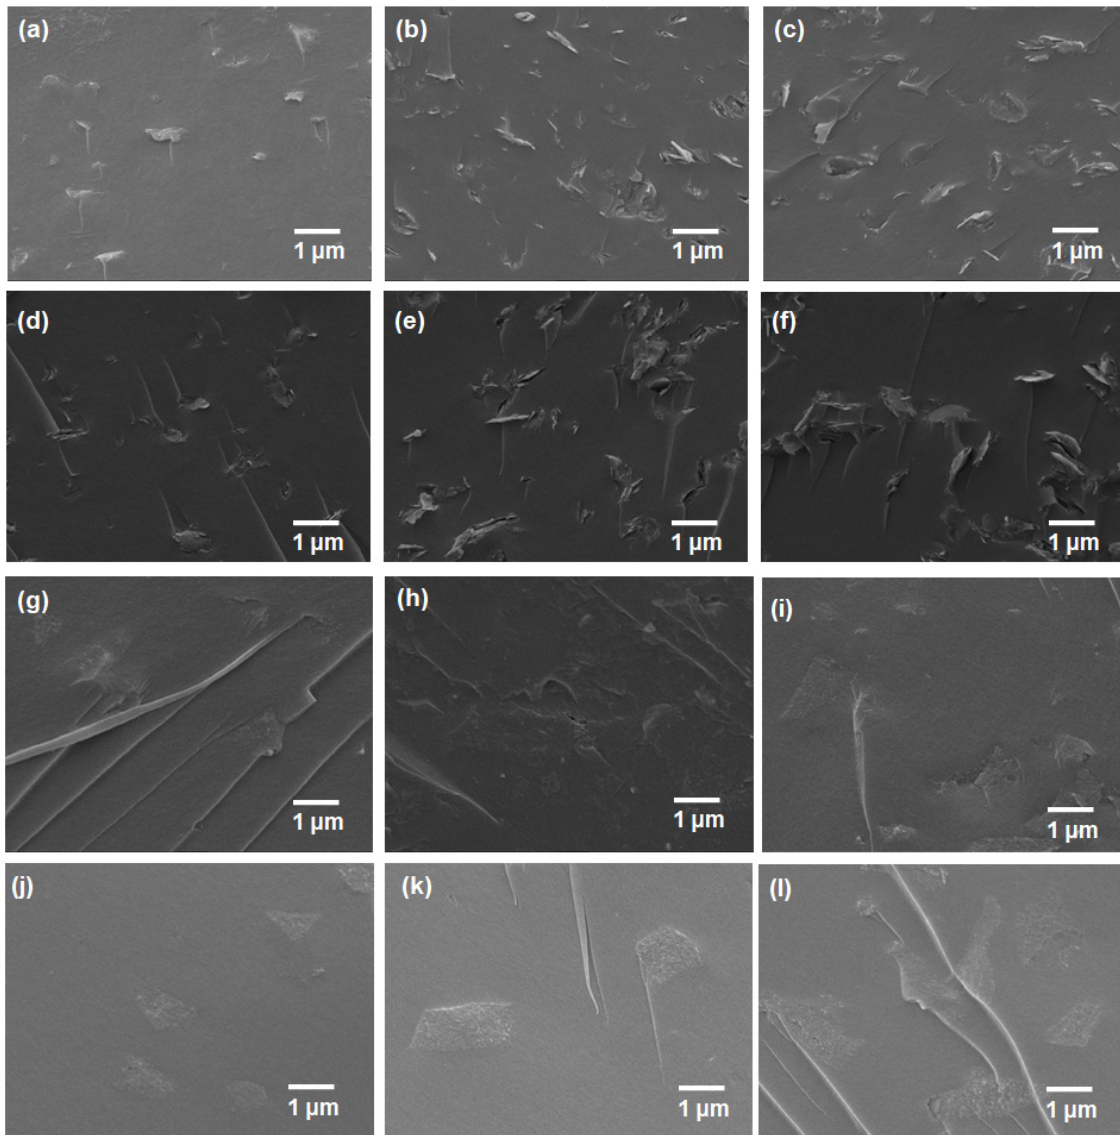

**Figure S7.** FESEM images of mixed-matrix carbon molecular sieve membranes at higher magnification. (a, b, c) 5 wt%, 10 wt% and 15 wt% GO in Matrimid® 5218; (d, e, f) 5 wt%, 10 wt% and 15 wt% GO in ODPA-TMPDA; (g, h, i) 5 wt%, 10 wt% and 15 wt% YP-50F in Matrimid® 5218; (j, k, l) 5 wt%, 10 wt% and 15 wt% YP-50F in ODPA-TMPDA.

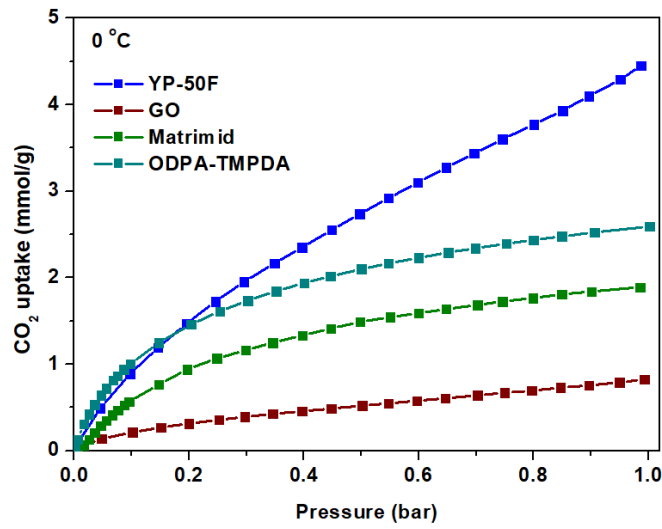

Figure S8. The CO<sub>2</sub> uptakes at 0 °C for YP-50F, GO, carbonized Matrimid® 5218 and carbonized ODPA-TMPDA.

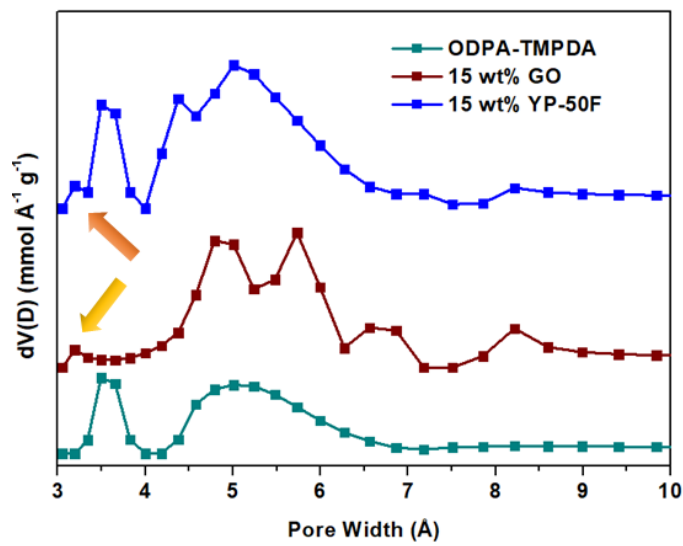

Figure S9. Pore size distribution of CMSMs and mixed-matrix CMSMs with ODPA-TMPDA as the polymer precursor. The arrowhead indicated in the figure shows the presence of smaller micropores in the mixed-matrix CMSMs.

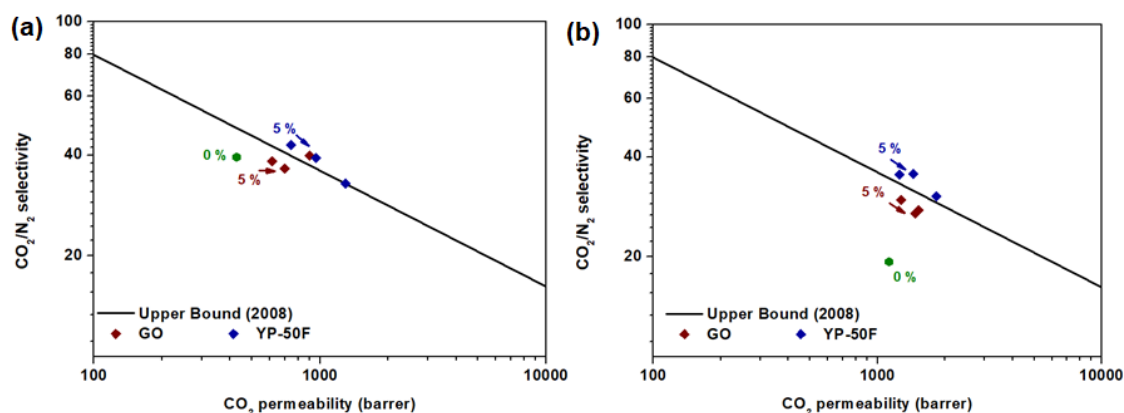

**Figure S10.** Robeson plot that demonstrates CO<sub>2</sub> permeabilities and CO<sub>2</sub>/N<sub>2</sub> selectivity of CMSMs that are based on (a) Matrimid® 5218 and (b) ODPa-TMPDA polymeric precursors.

## References

- Kim, Y.K.; Park, H.B.; Lee, Y.M. Carbon molecular sieve membranes derived from thermally labile polymer containing blend polymers and their gas separation properties. *J. Membr. Sci.* **2004**, *243*, 9–17, doi:10.1016/j.memsci.2004.05.001.
- Xiao, Y.; Dai, Y.; Chung, T.-S.; Guiver, M.D. Effects of Brominating Matrimid Polyimide on the Physical and Gas Transport Properties of Derived Carbon Membranes. *Macromol.* **2005**, *38*, 10042–10049, doi:10.1021/ma051354j.
- Fuertes, A.; Nevskaja, D.; Centeno, T. Carbon composite membranes from Matrimid® and Kapton® polyimides for gas separation. *Microporous Mesoporous Mater.* **1999**, *33*, 115–125, doi:10.1016/s1387-1811(99)00129-8.
- Suda, H.; Haraya, K. Gas Permeation through Micropores of Carbon Molecular Sieve Membranes Derived from Kapton Polyimide. *J. Phys. Chem. B* **1997**, *101*, 3988–3994, doi:10.1021/jp963997u.
- Zhang, B.; Wu, Y.; Lu, Y.; Wang, T.; Jian, X.; Qiu, J. Preparation and characterization of carbon and carbon/zeolite membranes from ODPa-ODA type polyetherimide. *J. Membr. Sci.* **2015**, *474*, 114–121, doi:10.1016/j.memsci.2014.09.054.
- Barsema, J.; Balster, J.; Jordan, V.; Van Der Vegt, N.; Wessling, M. Functionalized Carbon Molecular Sieve membranes containing Ag-nanoclusters. *J. Membr. Sci.* **2003**, *219*, 47–57, doi:10.1016/s0376-7388(03)00176-5.
- Itta, A.K.; Tseng, H.-H.; Wey, M.-Y. Effect of dry/wet-phase inversion method on fabricating polyetherimide-derived CMS membrane for H<sub>2</sub>/N<sub>2</sub> separation. *Int. J. Hydrogen Energy* **2010**, *35*, 1650–1658, doi:10.1016/j.ijhydene.2009.12.069.
- Rao, P.S.; Wey, M.-Y.; Tseng, H.-H.; Kumar, I.A.; Weng, T.-H. A comparison of carbon/nanotube molecular sieve membranes with polymer blend carbon molecular sieve membranes for the gas permeation application. *Microporous Mesoporous Mater.* **2008**, *113*, 499–510, doi:10.1016/j.micromeso.2007.12.008.
- Kita, H.; Yoshino, M.; Tanaka, K.; Okamoto, K.-I. Gas permselectivity of carbonized polypyrrolone membrane. *Chem. Commun.* **1997**, 1051–1052, doi:10.1039/a700048k.
- Yoshimune, M.; Fujiwara, I.; Haraya, K. Carbon molecular sieve membranes derived from trimethylsilyl substituted poly(phenylene oxide) for gas separation. *Carbon* **2007**, *45*, 553–560, doi:10.1016/j.carbon.2006.10.017.
- Li, L.; Wang, T.; Liu, Q.; Cao, Y.; Qiu, J. A high CO<sub>2</sub> permselective mesoporous silica/carbon composite membrane for CO<sub>2</sub> separation. *Carbon* **2012**, *50*, 5186–5195.
- Yin, X.; Wang, J.; Chu, N.; Yang, J.; Lu, J.; Zhang, Y.; Yin, D. Zeolite L/carbon nanocomposite membranes on the porous alumina tubes and their gas separation properties. *J. Membr. Sci.* **2010**, *348*, 181–189, doi:10.1016/j.memsci.2009.10.055.
- Yin, X.; Chu, N.; Yang, J.; Wang, J.; Li, Z. Thin zeolite T/carbon composite membranes supported on the porous alumina tubes for CO<sub>2</sub> separation. *Int. J. Greenh. Gas Control* **2013**, *15*, 55–64, doi:10.1016/j.ijggc.2013.01.032.
